# Supplementary material for: Zinc Deficiency Induces Autophagy in HT-22 Mouse Hippocampal Neuronal Cell Line
Source: MDPI journal article supplement (doi:10.3390/ijms23158811), 2022-08-08
Supplement: s1 [file s1]

**Supplementary Table S1. List of antibodies used in Western blot**

| Antibody       | Species | Dilution | Company (Catalog#)    |
|----------------|---------|----------|-----------------------|
| $\beta$ -actin | Rabbit  | 1:3000   | Cell signaling (4970) |
| SIRT1          | Mouse   | 1:1000   | Cell signaling (8469) |
| LC3            | Rabbit  | 1:1000   | Cell signaling (4108) |
| p-AMPK         | Rabbit  | 1:1000   | Cell signaling (2531) |
| AMPK           | Rabbit  | 1:1000   | Cell signaling (2603) |
| mTOR           | Rabbit  | 1:1000   | Cell signaling (2983) |
| p-mTOR         | Rabbit  | 1:1000   | Cell signaling (2971) |
